# Supplementary material for: Paraneoplastic Syndromes in Patients with Keratinocyte Skin Cancer
Source: MDPI journal article supplement (doi:10.3390/cancers14010249), 2022-01-04
Supplement: s1 [file s1]

**Supplementary Material****Paraneoplastic Syndromes in Patients with Keratinocyte Skin Cancer**

Christoforos Vlachos, Chrysanthi Tziortzioti and Ioannis D. Bassukas

**Content**

Table S1 p. 2

Table S2 p. 3

Table S3 p. 5

**Table S1.** Paraneoplastic syndromes in patients with keratinocyte skin cancer: Compilation of the clinical features stratified according to patients' gender.

| Keratinocyte skin cancer   |                                    | Total<br>(N=41) | Male<br>(N=34) | Female<br>(N=7) |
|----------------------------|------------------------------------|-----------------|----------------|-----------------|
| Localization <sup>a</sup>  | Head / neck                        | 7               | 4              | 3               |
|                            | Trunk                              | 19              | 17             | 2               |
|                            | Extremities                        | 14              | 12             | 2               |
|                            | N/A                                | 1               | 1              | 0               |
| PNS                        | MAH / HHM                          | 32              | 27             | 5               |
|                            | Anemia                             | 4               | 3              | 1               |
|                            | Bazex syndrome                     | 2               | 2              | 0               |
|                            | Other <sup>i</sup>                 | 3               | 2              | 1               |
| Timing of PNS <sup>b</sup> | before                             | 3               | 3              | 0               |
|                            | simultaneously                     | 22              | 16             | 6               |
|                            | after                              | 16              | 15             | 1               |
| Primary <sup>c</sup>       | No                                 | 21              | 15             | 3               |
|                            | Yes                                | 17              | 15             | 2               |
|                            | N/A                                | 3               | 4              | 1               |
| Recurrence <sup>d</sup>    | No                                 | 27              | 21             | 6               |
|                            | Yes                                | 11              | 11             | 0               |
|                            | N/A                                | 3               | 2              | 1               |
| Metastases                 | No                                 | 20              | 16             | 4               |
|                            | Yes                                | 17              | 15             | 2               |
|                            | N/A                                | 4               | 3              | 1               |
| Predilection <sup>e</sup>  | No                                 | 9               | 5              | 4               |
|                            | Yes                                | 23              | 21             | 2               |
|                            | N/A                                | 9               | 7              | 2               |
|                            | <i>Genodermatosis</i> <sup>g</sup> | 4               | 3              | 1               |
|                            | <i>Acquired</i> <sup>h</sup>       | 19              | 18             | 1               |
|                            | Scar/Ulcus                         | 9               | 8              | 1               |
|                            | (burn) Scar                        | 6               | 6              | 0               |
|                            | Ulcus                              | 3               | 2              | 1               |
|                            | Hidradenitis suppurativa           | 8               | 8              | 0               |
|                            | Chronic arsenic intoxication       | 1               | 1              | 0               |
|                            | Lymphedema                         | 1               | 1              | 0               |
| Resolution <sup>f</sup>    | Yes                                | 25              | 20             | 5               |
|                            | No                                 | 13              | 12             | 1               |
|                            | N/A                                | 3               | 2              | 1               |

**Abbreviations.** N/A: not available, PNS: paraneoplastic syndrome, MAH: malignancy associated hypercalcemia, HHM: humoral hypercalcemia of malignancy.

<sup>a</sup>Localization: localization of the primary neoplasm.

<sup>b</sup>Timing of PNS: time point of PNS diagnosis relative to the diagnosis of skin cancer.

<sup>c</sup>Primary: primary tumor only

<sup>d</sup>Recurrence: local tumor recurrence after treatment.

<sup>e</sup>Predilection: Presence of a condition that predisposes to skin cancer development.

<sup>f</sup>Resolution: resolution of paraneoplastic syndrome after skin cancer treatment. inflammatory arthralgias, neuropathy, antiphospholipid syndrome

<sup>g</sup>Genodermatoses: recessive dystrophic epidermolysis bullosa, porokeratosis Mibelli, xeroderma pigmentosum

<sup>h</sup>Acquired: acquired predilection.

**Table S2.** Paraneoplastic syndromes in patients with keratinocyte skin cancer. Compilation of the clinical features stratified according to the different skin cancer types. No (%): Number of cases and distribution of the cases among the different cancer types (% of cases with available information).

| Keratinocyte skin cancer, No (%)    |                             | Total<br>41(100) | BCC <sup>a</sup><br>4(10) | SCC<br>35(85) | Other <sup>b</sup><br>2(5) |
|-------------------------------------|-----------------------------|------------------|---------------------------|---------------|----------------------------|
| Sex, No (%)                         | Male                        | 34               | 2 (6)                     | 30 (88)       | 2 (6)                      |
|                                     | Female                      | 7                | 2 (29)                    | 5 (71)        | 0 (0)                      |
| Localization <sup>c</sup> , No (%)  | Head / neck                 | 7                | 2 (29)                    | 3 (42)        | 2 (29)                     |
|                                     | Trunk                       | 19               | 2 (11)                    | 17 (89)       | 0 (0)                      |
|                                     | Extremities                 | 14               | 0 (0)                     | 14 (100)      | 0 (0)                      |
|                                     | N/A                         | 1                | 0                         | 1             | 0                          |
| PNS, No (%)                         | MAH / HHM                   | 32               | 0 (0)                     | 30 (94)       | 2 (6)                      |
|                                     | Anemia                      | 4                | 3 (75)                    | 1 (25)        | 0 (0)                      |
|                                     | Bazex syndrome              | 2                | 0 (0)                     | 2 (100)       | 0 (0)                      |
|                                     | Other <sup>i</sup>          | 3                | 1 (33)                    | 2 (67)        | 0 (0)                      |
| Timing of PNS <sup>d</sup> , No (%) | before                      | 3                | 0 (0)                     | 3 (100)       | 0 (0)                      |
|                                     | simultaneously              | 22               | 1 (5)                     | 19 (85)       | 2 (10)                     |
|                                     | after                       | 16               | 3 (19)                    | 13 (81)       | 0 (0)                      |
| Primary <sup>e</sup> , No (%)       | No                          | 21               | 1 (5)                     | 20 (95)       | 0 (0)                      |
|                                     | Yes                         | 17               | 2 (12)                    | 13 (86)       | 2 (12)                     |
|                                     | N/A                         | 3                | 1                         | 2             | 0                          |
| Recurrence <sup>f</sup> , No (%)    | No                          | 27               | 2 (7)                     | 23 (86)       | 2 (7)                      |
|                                     | Yes                         | 11               | 1 (9)                     | 10 (91)       | 0 (0)                      |
|                                     | N/A                         | 3                | 1                         | 2             | 0                          |
| Metastases, No (%)                  | No                          | 20               | 3 (15)                    | 15 (75)       | 2 (10)                     |
|                                     | Yes                         | 17               | 1 (6)                     | 16 (94)       | 0 (0)                      |
|                                     | N/A                         | 4                | 0                         | 4             | 0                          |
| Predilection <sup>g</sup> , No (%)  | No                          | 9                | 2 (22)                    | 7 (78)        | 0 (0)                      |
|                                     | Yes                         | 23               | 0 (0)                     | 22 (96)       | 1 (4)                      |
|                                     | N/A                         | 9                | 2                         | 6             | 1                          |
|                                     | Genodermatosis <sup>j</sup> | 4                | 0 (0)                     | 4 (100)       | 0 (0)                      |
|                                     | Acquired <sup>k</sup>       | 19               | 0 (0)                     | 18 (95)       | 1 (5)                      |
|                                     | Scar/Ulcus                  | 9                | 0 (0)                     | 8 (89)        | 1 (11)                     |
|                                     | Hidradenitis suppurativa    | 8                | 0 (0)                     | 8 (100)       | 0 (0)                      |
| Resolution <sup>h</sup> , No (%)    | Other <sup>l</sup>          | 2                | 0 (0)                     | 2 (100)       | 0 (0)                      |
|                                     | Yes                         | 25               | 2 (8)                     | 21 (84)       | 2 (8)                      |
|                                     | No                          | 13               | 1 (8)                     | 12 (92)       | 0 (0)                      |
|                                     | N/A                         | 3                | 1                         | 2             | 0                          |

<sup>a</sup>Abbreviations. BCC: basal cell carcinoma, SCC: cutaneous squamous cell carcinoma, N/A: not available, PNS: paraneoplastic syndrome, MAH: malignancy associated hypercalcemia, HHM: humoral hypercalcemia of malignancy.

<sup>b</sup>One case of trichilemal carcinoma and one case of pilomatrixoma.

<sup>c</sup>Localization: localization of the primary neoplasm.

<sup>d</sup>Timing of PNS: time point of PNS diagnosis relative to the diagnosis of skin cancer.

<sup>e</sup>Primary: primary tumor only

<sup>f</sup>Recurrence: local tumor recurrence after treatment.

§Predilection: Presence of a condition that predisposes to skin cancer development.

hResolution: resolution of paraneoplastic syndrome after skin cancer treatment.

iInflammatory arthralgias, neuropathy, antiphospholipid syndrome

jGenodermatoses: recessive dystrophic epidermolysis bullosa, porokeratosis Mibelli, xeroderma pigmentosum

kAcquired: acquired predilection.

lChronic arsenic intoxication, lymphedema.

**Table S3.** Malignancy associated hypercalcemia (MAH) in KSC patients: Per patient laboratory findings of the N=32 cases with MAH.

| Ref <sup>a</sup> | Tumor            | Age/Sex <sup>b</sup> | Hypercalcemia <sup>c</sup> | Phosphorus | PTH <sup>d,e</sup> | PTHrP <sup>e</sup> | D <sub>3</sub> <sup>e</sup> |
|------------------|------------------|----------------------|----------------------------|------------|--------------------|--------------------|-----------------------------|
| 12               | SCC              | 67/M                 | severe                     | increased  | decreased          | increased          | decreased                   |
| 13 <sup>f</sup>  | SCC              | 58/M                 | severe                     | N/A        | decreased          | N/A                | N/A                         |
| 14               | SCC              | 82/M                 | moderate                   | norm       | norm               | increased          | N/A                         |
| 16               | SCC              | 38/M                 | moderate                   | norm       | norm               | N/A                | norm                        |
| 17 <sup>f</sup>  | SCC              | 50/M                 | mild                       | N/A        | norm               | increased          | N/A                         |
| 17 <sup>g</sup>  | SCC              | 60/M                 | mild                       | N/A        | N/A                | N/A                | N/A                         |
| 18 <sup>f</sup>  | SCC              | 20/M                 | severe                     | norm       | norm               | increased          | decreased                   |
| 19               | SCC              | 74/M                 | severe                     | norm       | norm               | N/A                | decreased                   |
| 20 <sup>g</sup>  | SCC              | 65/M                 | moderate                   | N/A        | norm               | norm               | norm                        |
| 21               | SCC              | 72/M                 | moderate                   | N/A        | norm               | increased          | norm                        |
| 22               | SCC              | 45/M                 | severe                     | N/A        | decreased          | increased          | decreased                   |
| 23               | SCC              | 59/M                 | moderate                   | decreased  | decreased          | increased          | N/A                         |
| 24               | SCC              | 65/F                 | severe                     | N/A        | decreased          | increased          | N/A                         |
| 25               | SCC              | 80/F                 | severe                     | decreased  | decreased          | increased          | norm                        |
| 26               | SCC              | 17/M                 | severe                     | norm       | decreased          | increased          | increased                   |
| 27               | SCC              | 38/M                 | moderate                   | decreased  | norm               | N/A                | norm                        |
| 28               | SCC              | 68/F                 | severe                     | norm       | decreased          | increased          | N/A                         |
| 31               | TRC <sup>d</sup> | 42/M                 | severe                     | N/A        | N/A                | increased          | N/A                         |
| 32               | PLM <sup>d</sup> | 32/M                 | severe                     | N/A        | decreased          | increased          | norm                        |
| 34 <sup>f</sup>  | SCC              | 5/F                  | severe                     | norm       | decreased          | N/A                | N/A                         |
| 35               | SCC              | 83/M                 | moderate                   | decreased  | decreased          | increased          | N/A                         |
| 36 <sup>g</sup>  | SCC              | 35/M                 | severe                     | norm       | norm               | N/A                | N/A                         |
| 37               | SCC              | 81/M                 | severe                     | norm       | norm               | N/A                | N/A                         |
| 38 <sup>g</sup>  | SCC              | 50/M                 | severe                     | norm       | decreased          | increased          | norm                        |
| 39 <sup>f</sup>  | SCC              | 45/M                 | severe                     | N/A        | norm               | N/A                | N/A                         |
| 40               | SCC              | 62/M                 | severe                     | norm       | N/A                | N/A                | N/A                         |
| 43               | SCC              | 53/M                 | moderate                   | decreased  | decreased          | increased          | N/A                         |
| 44 <sup>g</sup>  | SCC              | 68/M                 | moderate                   | N/A        | N/A                | N/A                | N/A                         |
| 45 <sup>g</sup>  | SCC              | 63/M                 | mild                       | norm       | decreased          | increased          | norm                        |
| 46 <sup>g</sup>  | SCC              | 51/M                 | mild                       | norm       | norm               | increased          | norm                        |
| 48               | SCC              | 28/F                 | severe                     | N/A        | norm               | increased          | norm                        |
| 49               | SCC              | 58/M                 | severe                     | norm       | decreased          | increased          | decreased                   |

<sup>a</sup>Ref: Reference number (References list in main text). <sup>b</sup>M: male, F: female. <sup>c</sup>Mild: 10.7 – 11.9 mg/dL; moderate: 12.0-13.9 mg/dL; severe: ≥14 mg/dL. <sup>d</sup>Abbreviations. D<sub>3</sub>: 1,25 (OH)<sub>2</sub> D<sub>3</sub>; KSC: Keratinocyte Skin Cancer; PLM: pilomatrixoma; PTH: parathormone; PTHrP: parathormone related protein; SCC: cutaneous Squamous Cell Carcinoma; TRC: trichilemmal carcinoma. <sup>e</sup>Explanations. norm: within normal range; increased: above norm range; decreased: below norm range; N/A: value not available. <sup>f</sup>Hypercalcemia-Leukocytosis cases. <sup>g</sup>Associated with hidradenitis suppurativa.
